# Supplementary material for: An early Oligocene fossil demonstrates treeshrews are slowly evolving “living fossils”
Source: PubMed Central journal article supplement (PMC4725336; doi:10.1038/srep18627), 2016-01-14
Supplement: srep18627-s1.pdf [file srep18627-s1.pdf]

## Supplementary Information for

An early Oligocene fossil demonstrates treeshrews are slowly evolving  
“living fossils”

Qiang Li<sup>1,2</sup>, Xijun Ni<sup>1,2</sup>

1. Key Laboratory of Vertebrate Evolution and Human Origins, Institute of Vertebrate Paleontology and Paleoanthropology, Chinese Academy of Sciences, 142 Xi Zhi Men Wai Street, Beijing, 100044, China
  2. CAS Center for Excellence in Tibetan Plateau Earth Sciences, Beijing, 100101, China
- Correspondence to: [nixijun@ivpp.ac.cn](mailto:nixijun@ivpp.ac.cn)

### **This PDF file includes:**

Figures S1 to S5

Tables S1 to S7

### **Other Supplementary Materials for this paper includes the following:**

Supplementary Datasets as TNT and NEXUS files:

Ni\_2015\_Treeshrews\_TNT.doc

Ni\_2015\_Treeshrews\_NEXUS.doc

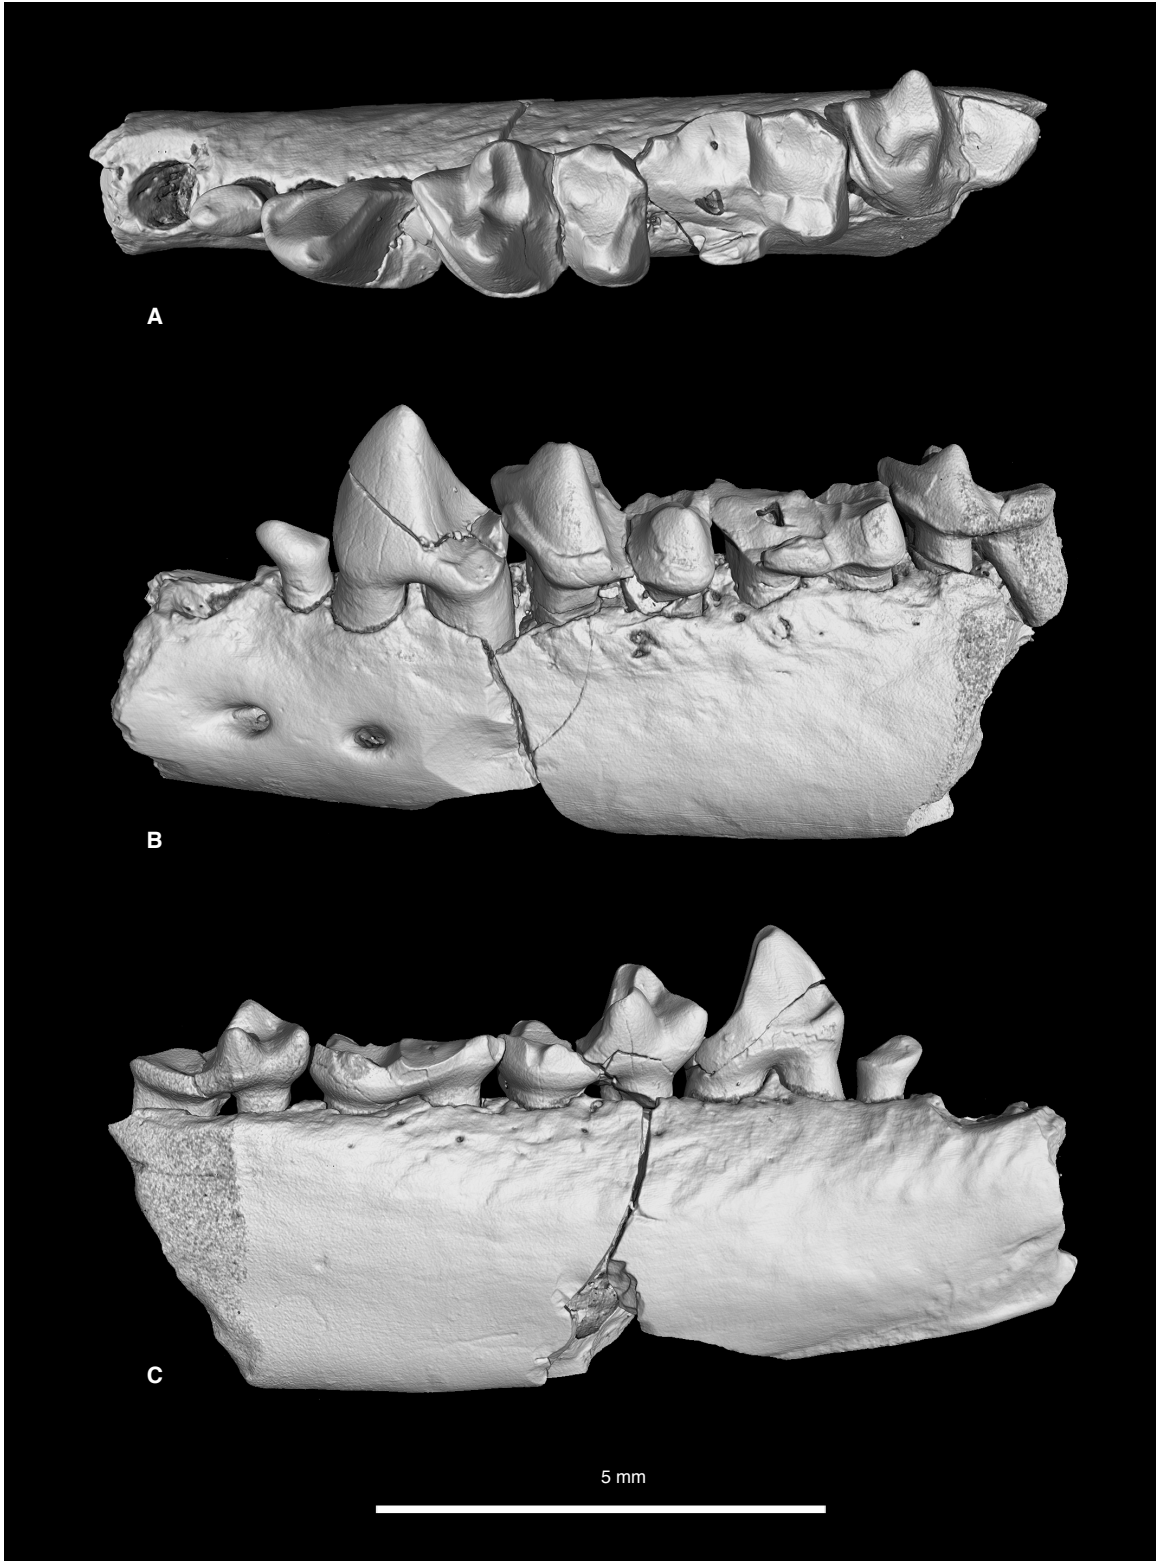

**Figure S1.**

Crown (**A**), buccal (**B**) and lingual (**C**) views of a left jaw fragment of *Ptilocercus kylin* sp. nov., retaining a small portion of the i2-3 alveoli, alveoli and roots of c and p2, and p3-m3 (IVPP V20699).

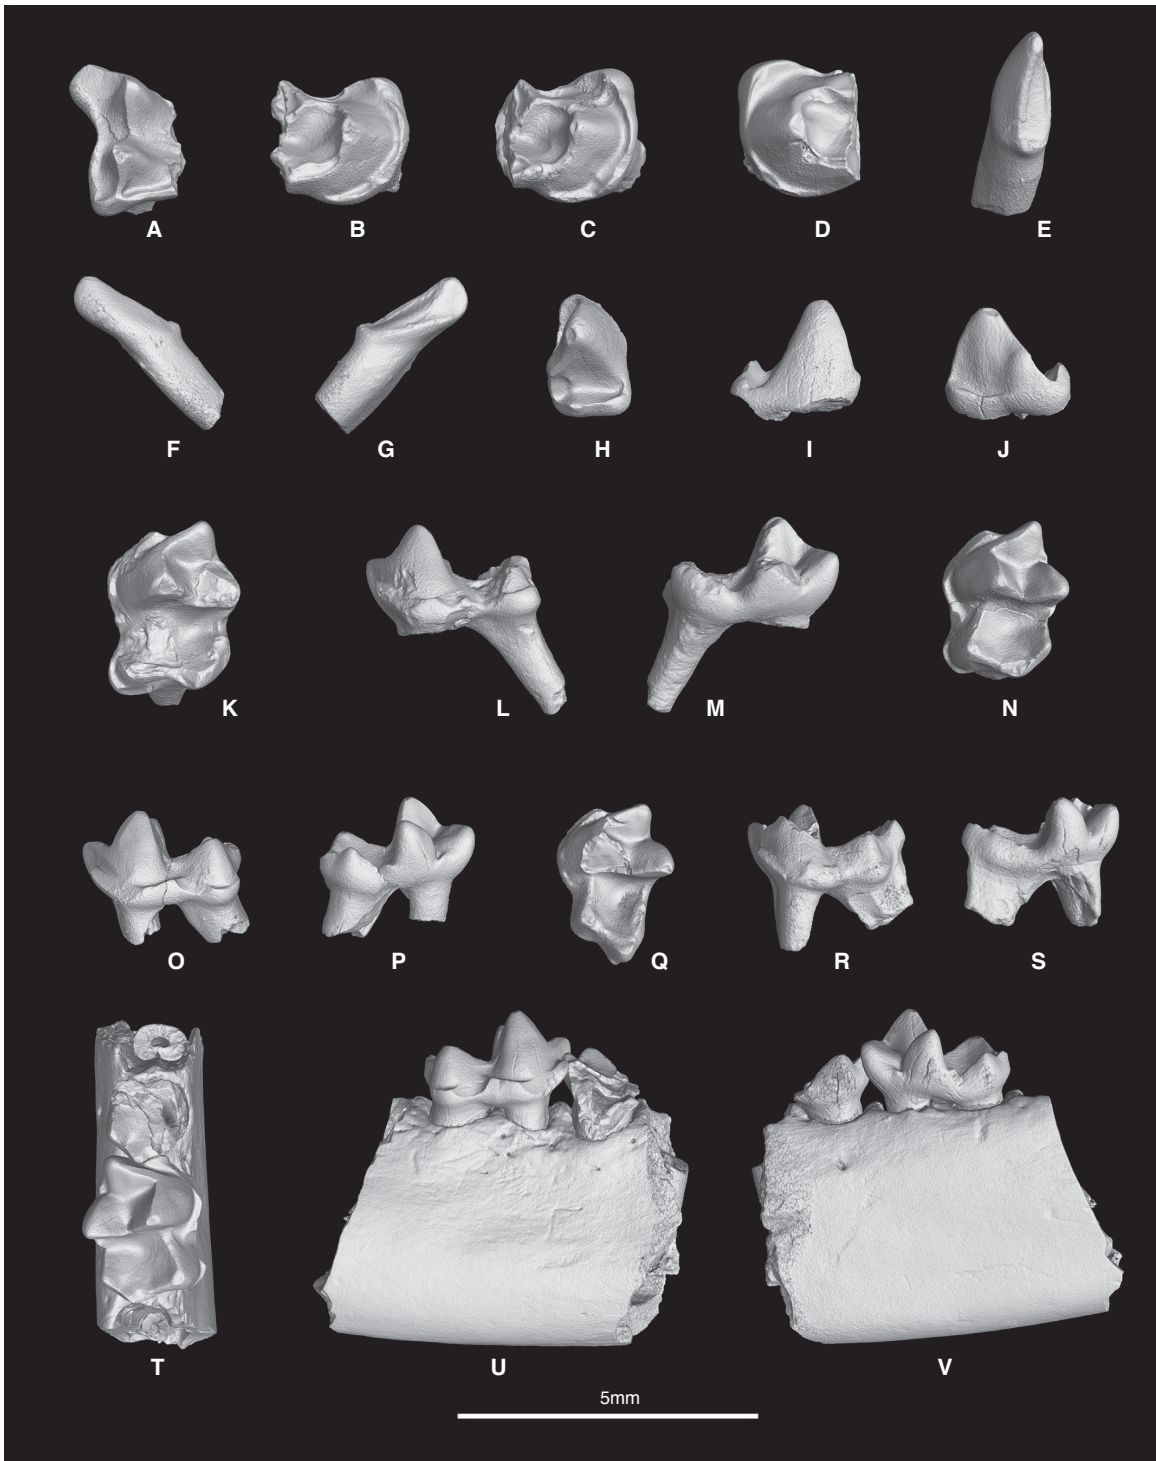

## Figure S2

Additional specimens of *Ptilocercus kylin* sp. nov. **A**, buccal half of a left M1, IVPP V 20697.1, crown view; **B**, lingual half of a left M1, IVPP V 20697.2, crown view; **C**, lingual half of a left M2, IVPP V 20697.3, crown view; **D**, lingual half of a right M2, IVPP V 20697.4, crown view; **E-G**, left c, IVPP V 20697.5, crown, buccal and lingual views; **H-J**, right p4, IVPP V 20697.6, crown, buccal and lingual views; **K-M**, left m1, IVPP V 20697.7, crown, buccal and lingual views; **N-P**, left m2, IVPP V 20697.8, crown, buccal and lingual views; **Q-S**, left m3, IVPP V 20697.9, crown, buccal and lingual views; **T-V**, right jaw fragment keeping m2, IVPP V 20698, crown, buccal and lingual views. Scale bar indicates 5 mm.

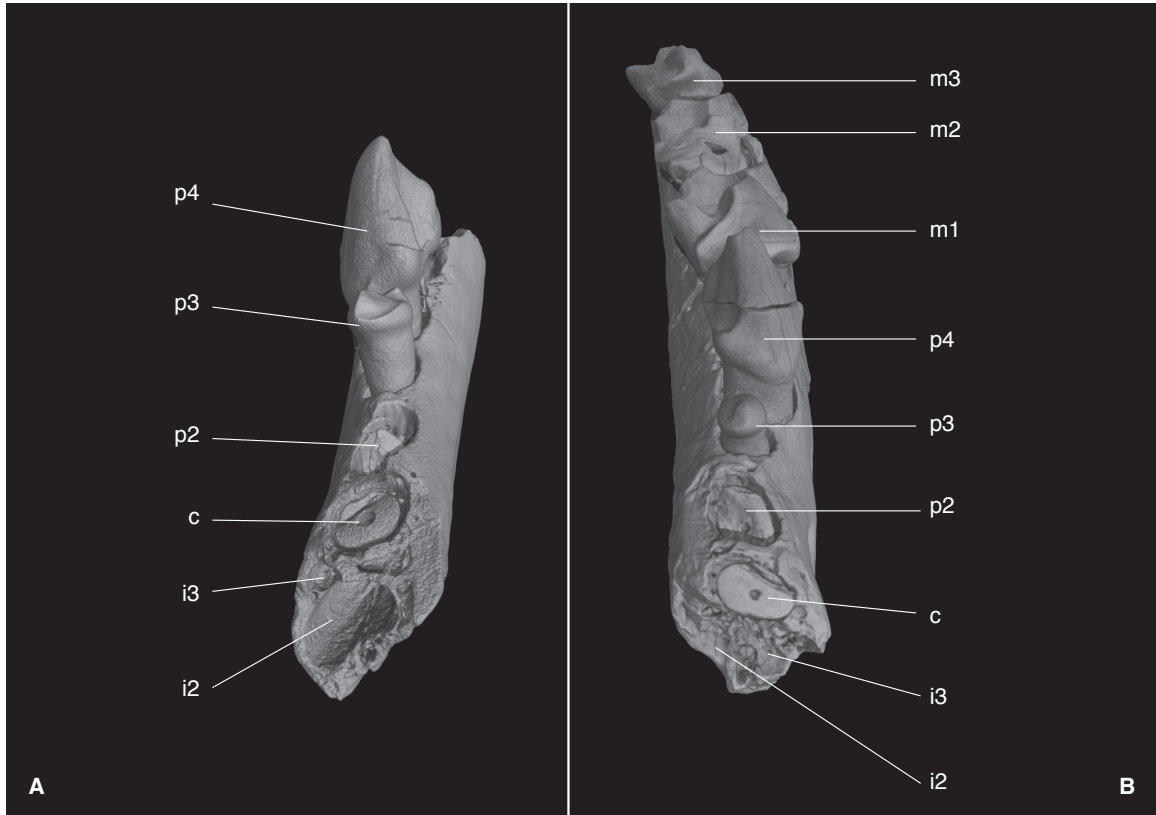

**Figure S3**

Rostral-crown view of two lower jaw fragments of *Ptilocercus kylin* sp. nov. showing the tooth and alveolar loci. **A**, a right lower jaw fragment retaining the alveoli of i2-3, c, alveoli and roots of c and p2, and p3-4 (IVPP V 20694); **B**, a left lower jaw fragment retaining a small portion of the i2-3 alveoli, alveoli and roots of c and p2, and p3-m3 (IVPP V20699).

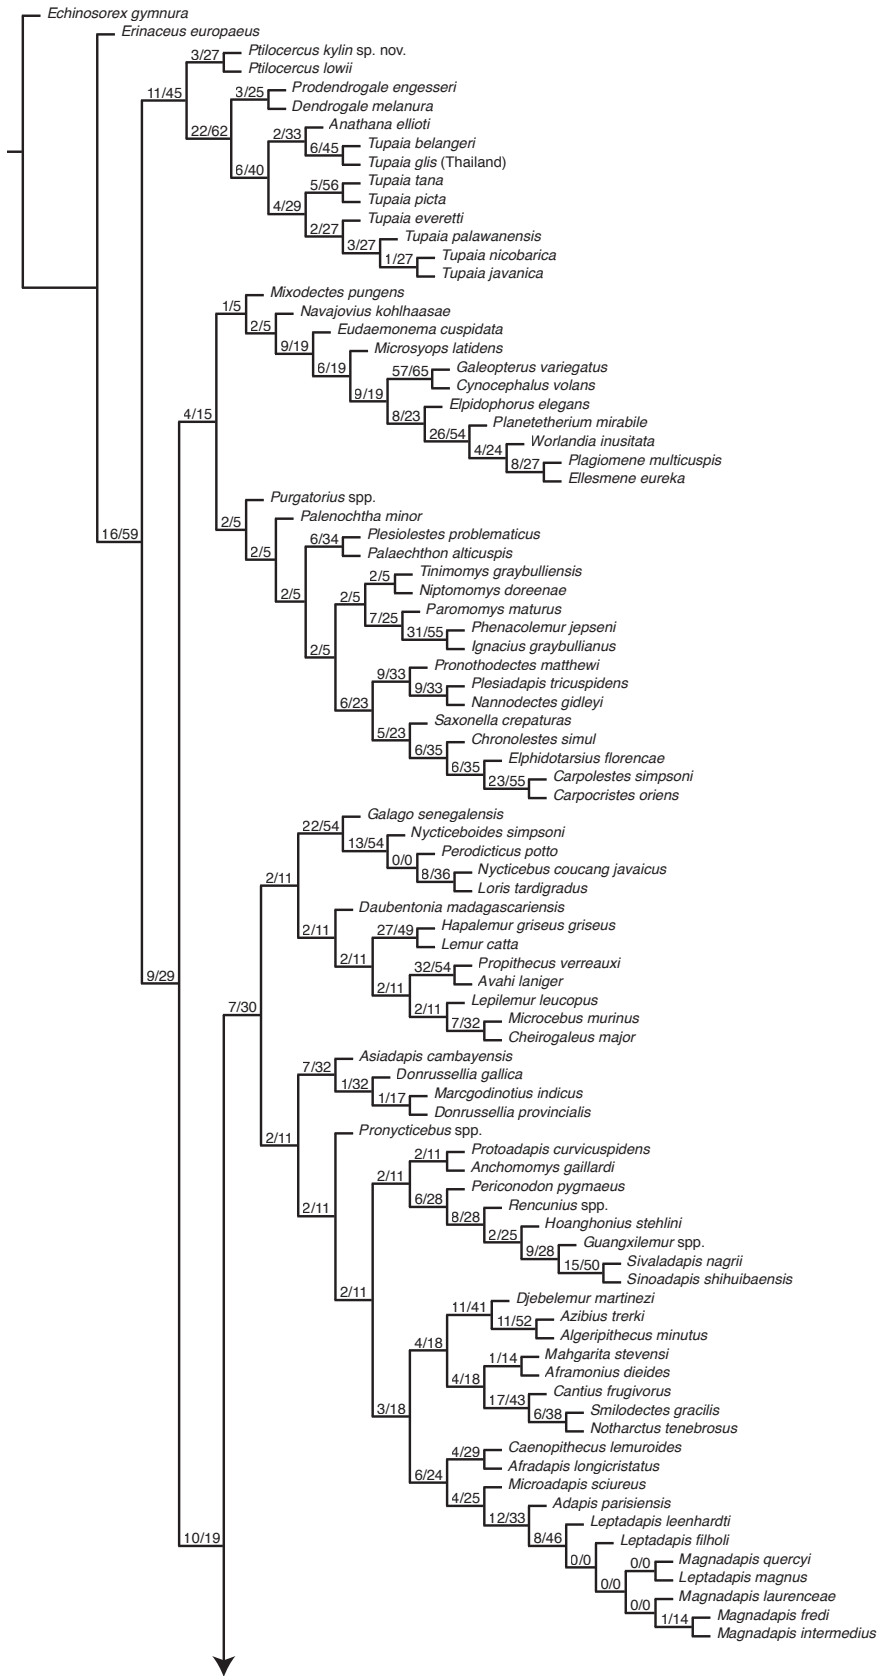

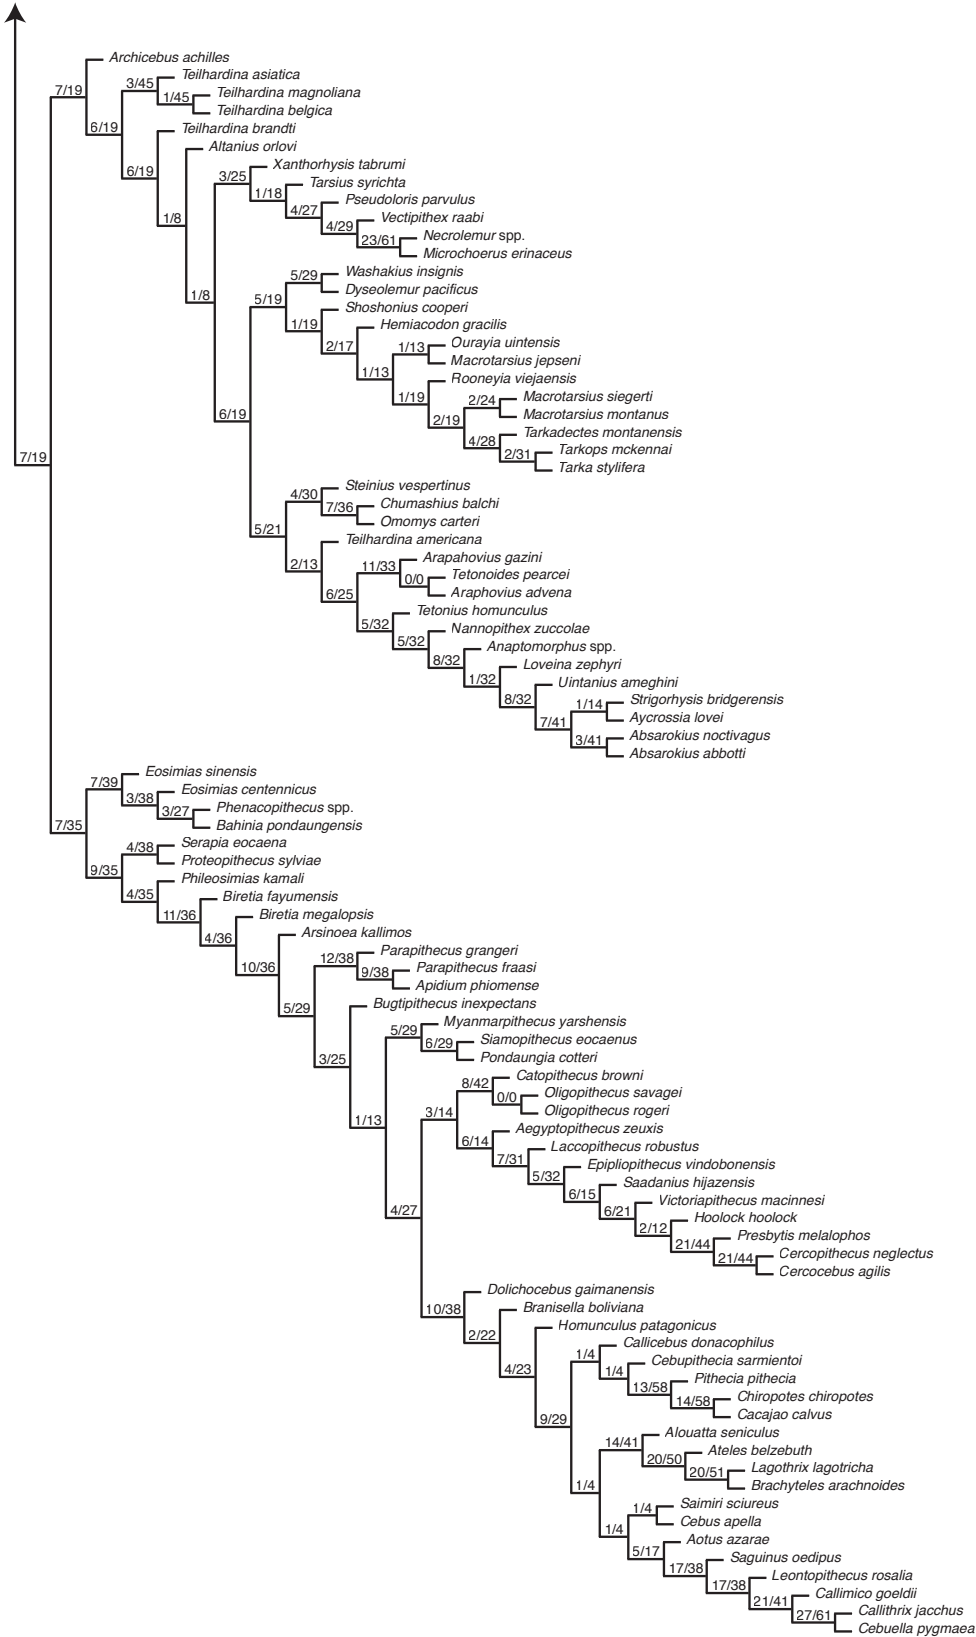



**Figure S4**

Bremer supports for the strict consensus tree from backbone-constrained phylogenetic analysis. Numbers before the slashes are the Bremer Support values; numbers after the slashes are Relative Supports.

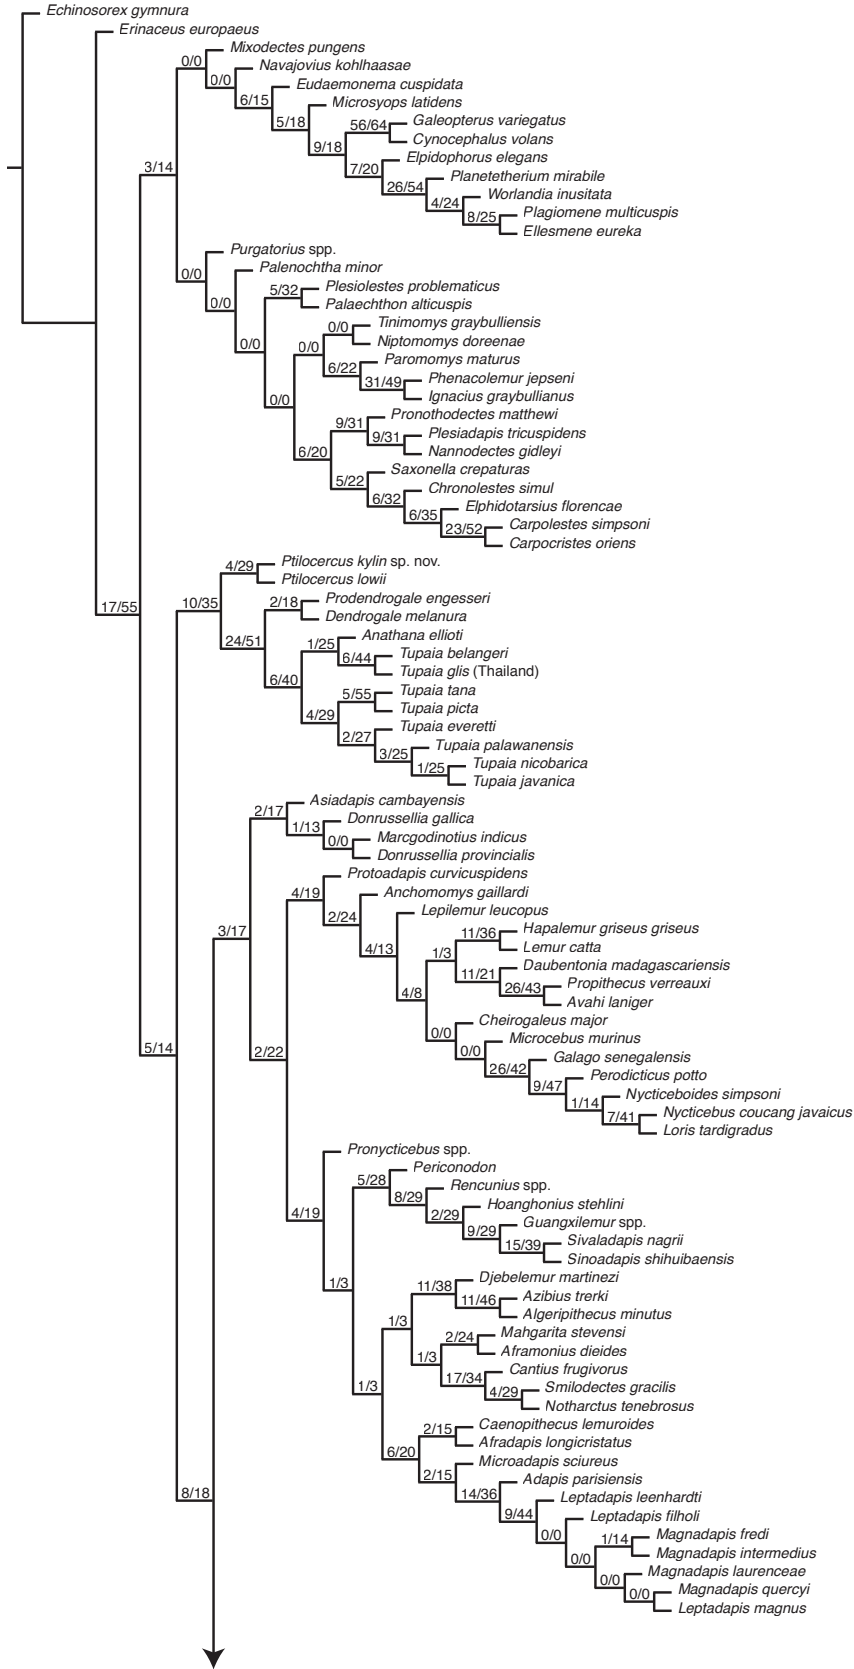

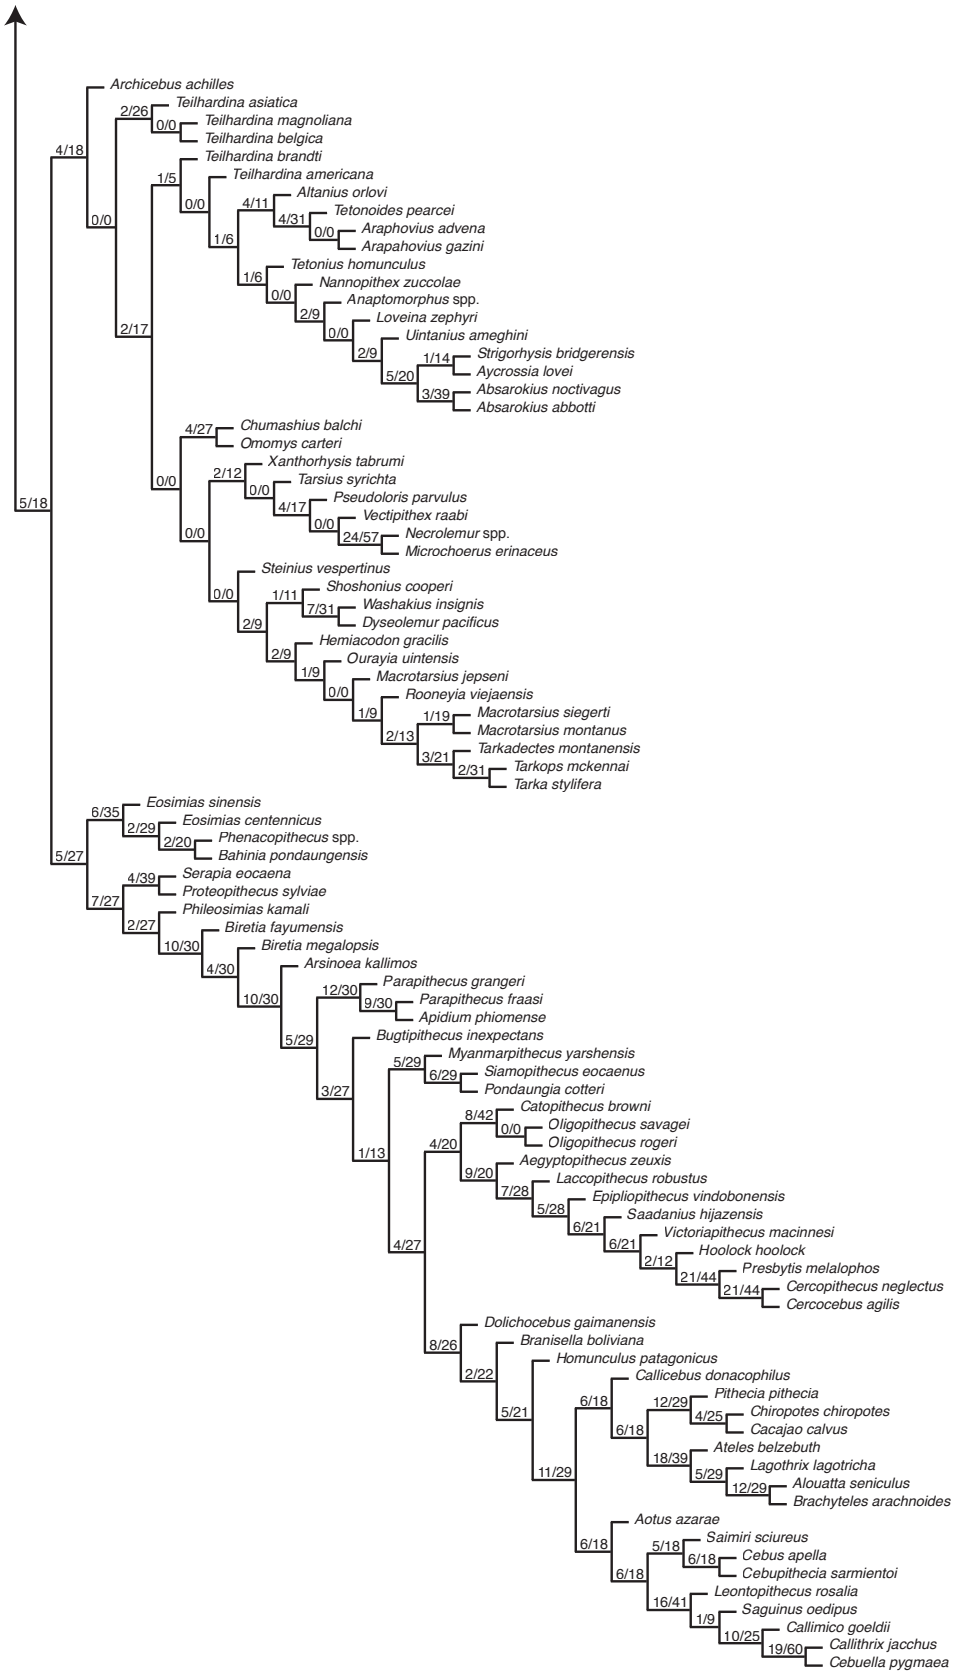

**Figure S5**

Bremer supports for the strict consensus tree from non-constraint phylogenetic analysis. Numbers before the slashes are the Bremer Support values; numbers after the slashes are Relative Supports.

**Table S1.**

Measurements of the specimens

| Specimen No. | Specimen                                       | Length (mm) | Width (mm) |
|--------------|------------------------------------------------|-------------|------------|
| IVPPV20697.1 | Left upper M1 buccal half                      | 2.34        | -          |
| IVPPV20697.2 | Left upper M1 lingual half                     | -           | -          |
| IVPPV20697.3 | Left upper M2 lingual half                     | -           | -          |
| IVPPV20697.4 | Right upper M2 lingual half                    | -           | -          |
| IVPPV20697.5 | Left lower canine                              | 1.81        | 0.93       |
| IVPPV20697.6 | Right lower p4                                 | 1.94        | 1.42       |
| IVPPV20697.7 | Left lower m1                                  | 2.76        | 2.00       |
| IVPPV20697.8 | Left lower m2                                  | 2.42        | 1.74       |
| IVPPV20697.9 | Left lower m3                                  | 2.47        | 1.70       |
| IVPPV20698   | Right lower fragmental mandible with m2: m2    | 2.49        | 1.70       |
| IVPPV20699   | Left lower fragmental mandible with p3-m3: p3  | 0.92        | 0.67       |
| IVPPV20699   | Left lower fragmental mandible with p3-m3: p4  | 2.08        | 1.45       |
| IVPPV20699   | Left lower fragmental mandible with p3-m3: m1  | 2.70        | 2.01       |
| IVPPV20699   | Left lower fragmental mandible with p3-m3: m2  | 2.49        | 1.83       |
| IVPPV20699   | Left lower fragmental mandible with p3-m3: m3  | 2.20        | 1.71       |
| IVPPV20690   | Right upper M1 buccal half                     | 2.70        | -          |
| IVPPV20689   | Left upper M1 lingual half                     | -           | -          |
| IVPPV20691   | Right upper M2                                 | 2.36        | 3.30       |
| IVPPV20692   | Right upper M3 buccal half                     | 2.11        | -          |
| IVPPV20693   | Right lower canine                             | 1.79        | 0.99       |
| IVPPV20694   | Right lower fragmental mandible with p3-p4: p3 | 1.05        | 0.86       |
| IVPPV20694   | Right lower fragmental mandible with p3-p4: p4 | 2.20        | 1.65       |
| IVPPV20695   | Right lower m1                                 | 2.59        | 1.77       |
| IVPPV20696   | Right lower fragmental mandible with m2-m3: m2 | 2.55        | 1.92       |
| IVPPV20696   | Right lower fragmental mandible with m2-m3: m3 | 2.61        | 1.81       |

**Table S2.**

TNT script for running multiple replications, using sectorial searches, drifting, ratchet and fusing combined

---

```
log Ni_2015_treeshrews.log;
mxram 1000;
p Ni_2015_treeshrews_TNT.txt;
hold 100000;
coll tbr;
report +/1;
tsave * Ni_2015_treeshrews.tre;
xm=level 10 177 rep 10000 fuse 10 dri 10 rss css xss hit 1 rat 10 xmix;
save;
tsave/;
log/;
zzz;
```

---

**Table S3.**

Comparison between the results from backbone-constrained searches and non-constraint searches

|                                       | Without constraints | Backbone constrained |
|---------------------------------------|---------------------|----------------------|
| Replications                          | 10000               | 10000                |
| Most parsimonious tree number         | 47                  | 20                   |
| Searching time                        | 19:59:50            | 20:53:09             |
| Rearrangements examined               | 769,986,524,849     | 728,067,644,730      |
| Tree length                           | 13067               | 13141                |
| Consensus Method                      | Strict              | Strict               |
| Tree length of consensus              | 14124               | 13914                |
| Consistency Index of consensus        | 0.2110              | 0.2142               |
| Retention Index of consensus          | 0.7182              | 0.7235               |
| Ptilocercidae monophyly               | supported           | supported            |
| Tupaiidae monophyly                   | supported           | supported            |
| Scandentia monophyly                  | supported           | supported            |
| Plesiadapiformes-Dermoptera monophyly | supported           | supported            |
| Primates monophyly                    | supported           | supported            |
| Primates-Scandentia monophyly         | supported           | not supported        |
| Archonta monophyly                    | supported           | supported            |

**Table S4.**

TNT script for calculating the Bremer Supports and Relative Bremer Supports

---

```
log Ni_2015_treeshrews_Bremer.log;
mxram 4000;
p Ni_2015_treeshrews_TNT.txt;
hold 100000;
sub 100 ;
ttag= ;
p Ni_2015_treeshrews.tre ;
bsupp !!+0 1. ;
sub 100x0.90 ;
bsupp [!!+0 1.;
ttag;
ttag & Ni_2015_treeshrews_Bremer.svg;
log/;
zzz;
```

---



**Table S5.**

Synapomorphic characters supporting the Ptilocercidae clade

| Character                     | Steps | CI    | Change  |
|-------------------------------|-------|-------|---------|
| 4 (I 4: Upper I1 root orient) | 1     | 0.059 | 0 --> 1 |
| 13 (I 13: Upper I1 mesioling) | 1     | 0.100 | 0 --> 1 |
| 28 (I 28: Upper I2 distal he) | 1     | 0.125 | 1 --> 0 |
| 32 (I 31: Two-rooted upper i) | 1     | 0.500 | 1 --> 0 |
| 45 (C 10: Distal heel on upp) | 1     | 0.267 | 0 --> 1 |
| 57 (P 7: Upper P2 length rel) | 1     | 0.091 | 0 --> 1 |
| 58 (P 8: Upper P2 length rel) | 1     | 0.088 | 0 --> 1 |
| 63 (P 13: Upper P2 metastyle) | 1     | 0.138 | 0 --> 1 |
| 65 (P 15: Upper P2 lingual c) | 1     | 0.118 | 1 --> 0 |
| 68 (P 18: Upper P2 distal ci) | 1     | 0.062 | 0 --> 1 |
| 76 (P 25: Upper P3 size rela) | 1     | 0.118 | 1 --> 0 |
| 77 (P 26: Upper P3 paracone ) | 1     | 0.135 | 2 --> 0 |
| 80 (P 29: Upper P3 protocone) | 1     | 0.059 | 0 --> 1 |
| 113 (P 60: Upper P3 "Nannopi) | 1     | 0.120 | 1 --> 0 |
| 118 (P 65: Upper P4 buccal-l) | 1     | 0.125 | 2 --> 1 |
| 129 (P 76: Upper P4 metastyl) | 1     | 0.094 | 1 --> 2 |
| 140 (P 87: Upper P4 mesial c) | 1     | 0.105 | 1 --> 0 |
| 168 (M 2: Upper M1 hypocone)  | 1     | 0.109 | 1 --> 2 |
| 212 (M 44: Upper M1-2 lingua) | 1     | 0.190 | 0 --> 1 |
| 258 (i 2: Lower i1 size)      | 1     | 0.083 | 1 ==> 0 |
| 267 (i 11: Lower incisor occ) | 1     | 0.111 | 0 --> 1 |
| 286 (c 2: Lower canine size)  | 1     | 0.056 | 1 ==> 2 |
| 287 (c 3: Lower canine heigh) | 1     | 0.129 | 1 ==> 0 |
| 296 (c 12: Long axis of the ) | 1     | 0.143 | 0 ==> 1 |
| 304 (p 7: Lower p2 size rela) | 2     | 0.136 | 0 ==> 2 |
| 305 (p 8: Lower p2 crown hei) | 2     | 0.158 | 0 --> 2 |
| 316 (p 19: Lower p3 length r) | 1     | 0.095 | 1 --> 0 |
| 322 (p 25: Lower p3 lingual ) | 1     | 0.074 | 0 ==> 1 |
| 339 (p 42: Lower p3 root num) | 1     | 0.059 | 0 ==> 1 |
| 340 (p 43: Lower p3 orientat) | 1     | 0.143 | 0 ==> 1 |
| 358 (p 61: Lower p4 postmeta) | 1     | 0.034 | 0 ==> 1 |
| 360 (p 63: Lower p4 mesiolin) | 1     | 0.059 | 0 --> 1 |
| 404 (m 18: Lower m1 position) | 1     | 0.116 | 1 ==> 0 |
| 470 (m 83: Lower m1-2 distob) | 1     | 0.136 | 1 --> 2 |
| 488 (Cranial 3: Anteroposter) | 1     | 0.231 | 0 --> 1 |
| 506 (Cranial 21: Mastoid for) | 1     | 0.500 | 0 --> 1 |
| 517 (Cranial 32: Epitympanic) | 1     | 0.111 | 0 --> 1 |
| 519 (Cranial 34: Bony tube e) | 1     | 0.333 | 0 --> 1 |
| 531 (Cranial 46: Medial expo) | 1     | 1.000 | 0 --> 1 |
| 556 (Cranial 70: Suprameatal) | 1     | 0.500 | 0 --> 1 |
| 560 (Cranial 74: Orbital con) | 1     | 0.188 | 0 --> 1 |

|                                |   |       |         |
|--------------------------------|---|-------|---------|
| 561 (Cranial 75: Orbital fron) | 1 | 0.150 | 1 --> 0 |
| 686 (Mandibular 17: Orientat)  | 1 | 0.045 | 0 --> 1 |
| 696 (Vertebral 9: Number of)   | 1 | 0.200 | 0 --> 2 |
| 700 (Vertebral 13: Ventrodor)  | 1 | 0.250 | 1 --> 2 |
| 703 (Vertebral 16: Accessory)  | 1 | 0.200 | 1 --> 0 |
| 707 (Vertebral 20: Width of)   | 1 | 0.167 | 0 --> 1 |
| 713 (Costal 1: Rib craniocau)  | 1 | 0.333 | 0 --> 1 |
| 716 (Scapular 3: Coracoid pr)  | 1 | 0.250 | 0 --> 1 |
| 719 (Scapular 6: Spine tilt )  | 1 | 0.214 | 0 --> 1 |
| 740 (Humeral 6: Orientation )  | 1 | 0.111 | 1 --> 0 |
| 743 (Humeral 9: Anterior sur)  | 1 | 0.091 | 0 --> 1 |
| 744 (Humeral 10: Zona conoid)  | 1 | 0.211 | 0 --> 1 |
| 748 (Humeral 14: Anterior tr)  | 1 | 0.222 | 0 --> 1 |
| 749 (Humeral 15: Posterior u)  | 1 | 0.500 | 2 --> 1 |
| 751 (Humeral 17: Medial epic)  | 1 | 0.105 | 0 --> 1 |
| 763 (Humeral 29: Lesser tube)  | 1 | 0.167 | 1 --> 0 |
| 796 (Carpal 6: Centrale arti)  | 1 | 0.333 | 0 --> 1 |
| 800 (Carpal 10: Lunate artic)  | 1 | 0.200 | 0 --> 1 |
| 807 (Carpal 17: Spiral proxi)  | 1 | 0.500 | 0 --> 1 |
| 814 (Innominate 2: Divergenc)  | 1 | 0.111 | 0 --> 1 |
| 815 (Innominate 3: Width of)   | 1 | 0.250 | 2 --> 1 |
| 818 (Innominate 6: Anterior )  | 1 | 0.211 | 1 --> 2 |
| 822 (Innominate 10: Ischiac )  | 1 | 0.304 | 1 --> 0 |
| 823 (Innominate 11: Ischiac )  | 1 | 0.150 | 1 --> 0 |
| 830 (Innominate 18: Pubic le)  | 2 | 0.280 | 0 --> 2 |
| 854 (Femoral 20: Lateral con)  | 1 | 0.167 | 1 --> 0 |
| 855 (Femoral 21: Relative si)  | 1 | 0.133 | 0 --> 1 |
| 856 (Femoral 22: Medial bulg)  | 1 | 0.100 | 0 --> 1 |
| 865 (Tibial 4: Shape of dist)  | 1 | 0.333 | 0 --> 1 |
| 870 (Tibial 9: Shape of dist)  | 1 | 0.133 | 1 --> 2 |
| 883 (Astragalar 1: Height of)  | 1 | 0.087 | 1 --> 2 |
| 897 (Astragalar 14: Talar he)  | 1 | 0.077 | 1 --> 0 |
| 901 (Astragalar 18: Talar bo)  | 1 | 0.125 | 0 --> 1 |
| 906 (Calcaneal 4: Relative l)  | 1 | 0.211 | 1 --> 0 |
| 918 (Calcaneal 16: Plantar t)  | 1 | 0.125 | 0 --> 1 |
| 923 (Navicular 2: Position o)  | 1 | 0.333 | 0 --> 1 |
| 924 (Navicular 3: Expansion )  | 1 | 0.400 | 0 --> 1 |
| 934 (Cuneiform 2: Entocuneif)  | 1 | 0.143 | 0 --> 1 |
| 937 (Cuneiform 5: Medial ext)  | 1 | 0.222 | 0 --> 1 |

---

**Table S6.**

Synapomorphic characters supporting the Tupaiidae clade

| Characters                    | Steps | CI    | Change  |
|-------------------------------|-------|-------|---------|
| 33 (I 32: Diastema between u) | 1     | 0.200 | 1 ==> 2 |
| 48 (C 13: Diastema between u) | 1     | 0.167 | 2 ==> 1 |
| 85 (P 34: Upper P3 preparacr) | 1     | 0.059 | 1 --> 0 |
| 86 (P 35: Upper P3 pronounce) | 1     | 0.250 | 1 ==> 0 |
| 126 (P 73: Upper P4 preparac) | 1     | 0.069 | 2 --> 0 |
| 173 (M 6: Upper M1 paraconul) | 1     | 0.200 | 1 ==> 2 |
| 174 (M 7: Upper M1 preparaco) | 2     | 0.061 | 0 --> 2 |
| 181 (M 14: Upper M2 hypocone) | 1     | 0.088 | 1 --> 0 |
| 185 (M 18: Upper M2 metacone) | 1     | 0.077 | 0 ==> 2 |
| 190 (M 22: Upper M2 paraconu) | 1     | 0.205 | 1 ==> 2 |
| 191 (M 23: Upper M2 preparac) | 2     | 0.057 | 0 --> 2 |
| 215 (M 47: Upper M1-2 parast) | 1     | 0.169 | 1 ==> 2 |
| 220 (M 52: Upper M1-2 prepar) | 1     | 0.240 | 0 ==> 2 |
| 221 (M 53: Upper M1-2 postpa) | 1     | 0.115 | 2 ==> 0 |
| 224 (M 56: Upper M1-2 mesost) | 3     | 0.323 | 0 ==> 3 |
| 225 (M 57: Upper M1-2 stylar) | 1     | 0.120 | 2 ==> 3 |
| 235 (M 66: Upper M1-2 prepro) | 1     | 0.048 | 0 ==> 1 |
| 239 (M 70: Upper M1-2 paraco) | 1     | 0.091 | 0 --> 1 |
| 240 (M 71: Upper M1-2 mesial) | 2     | 0.259 | 0 ==> 2 |
| 241 (M 72: Upper M1-2 distal) | 2     | 0.364 | 0 ==> 2 |
| 246 (M 77: Upper M1-2 connec) | 1     | 0.125 | 0 ==> 2 |
| 250 (M 81: Upper M1-2 deep s) | 1     | 0.333 | 0 ==> 1 |
| 263 (i 7: Tooth comb)         | 1     | 0.333 | 0 ==> 1 |
| 292 (c 8: Diastema between c) | 1     | 0.154 | 2 ==> 1 |
| 325 (p 28: Lower p3 paraconi) | 1     | 0.214 | 0 --> 1 |
| 348 (p 51: Lower p4 metaconi) | 1     | 0.136 | 1 ==> 2 |
| 350 (p 53: Lower p4 metaconi) | 1     | 0.125 | 1 --> 0 |
| 351 (p 54: Lower p4 paraconi) | 1     | 0.070 | 1 ==> 2 |
| 355 (p 58: Lower p4 buccal p) | 1     | 0.074 | 2 --> 1 |
| 407 (m 21: Lower m1 buccal c) | 2     | 0.075 | 2 ==> 0 |
| 408 (m 22: Lower m1 mesiobuc) | 2     | 0.093 | 2 --> 0 |
| 409 (m 23: Lower m1 hypoflex) | 1     | 0.043 | 1 ==> 2 |
| 426 (m 39: Lower m2 position) | 1     | 0.278 | 0 ==> 1 |
| 429 (m 42: Lower m2 buccal c) | 2     | 0.098 | 2 ==> 0 |
| 430 (m 43: Lower m2 mesiobuc) | 2     | 0.095 | 2 --> 0 |
| 431 (m 44: Lower m2 hypoflex) | 1     | 0.067 | 1 ==> 2 |
| 448 (m 61: Lower m3 mesiobuc) | 2     | 0.128 | 2 --> 0 |
| 470 (m 83: Lower m1-2 distob) | 1     | 0.136 | 1 ==> 0 |

|                               |   |       |         |
|-------------------------------|---|-------|---------|
| 518 (Cranial 33: Epitympanic) | 1 | 0.500 | 0 ==> 1 |
| 623 (Cranial 138: Palate fen) | 1 | 0.250 | 0 ==> 1 |
| 697 (Vertebral 10: Length of) | 1 | 0.111 | 1 --> 0 |
| 715 (Scapular 2: Coracoid pr) | 1 | 0.333 | 2 --> 1 |
| 717 (Scapular 4: craniolater) | 1 | 0.143 | 0 --> 1 |
| 718 (Scapular 5: Infraspinou) | 1 | 0.667 | 1 --> 2 |
| 726 (Scapular 13: Axilloklen) | 1 | 0.235 | 1 --> 0 |
| 733 (Scapular 20: Triceps pi) | 1 | 0.222 | 0 --> 1 |
| 737 (Humeral 3: Capitulum sh) | 1 | 0.154 | 1 --> 0 |
| 738 (Humeral 4: Capitular ta) | 1 | 0.111 | 1 --> 2 |
| 741 (Humeral 7: Medial edge ) | 1 | 0.133 | 0 --> 1 |
| 746 (Humeral 12: On the dist) | 1 | 0.071 | 0 --> 1 |
| 747 (Humeral 13: Relative he) | 1 | 0.176 | 0 --> 1 |
| 757 (Humeral 23: Brachialis ) | 1 | 0.091 | 1 --> 0 |
| 765 (Humeral 31: Deltopector) | 1 | 0.125 | 1 --> 2 |
| 768 (Ulnar 1: Length of the ) | 1 | 0.176 | 1 --> 0 |
| 782 (Radial 1: Shape of the ) | 1 | 0.333 | 1 --> 0 |
| 797 (Carpal 7: Lunate fused ) | 1 | 0.333 | 0 --> 1 |
| 816 (Innominate 4: Concavene) | 1 | 0.167 | 1 --> 0 |
| 818 (Innominate 6: Anterior ) | 1 | 0.211 | 1 --> 0 |
| 820 (Innominate 8: length of) | 1 | 0.192 | 1 --> 0 |
| 824 (Innominate 12: Shape of) | 1 | 0.167 | 1 --> 0 |
| 829 (Innominate 17: Anterior) | 1 | 0.167 | 0 --> 1 |
| 838 (Femoral 4: Length index) | 1 | 0.125 | 1 --> 2 |
| 840 (Femoral 6: Proximal ext) | 1 | 0.318 | 1 --> 2 |
| 861 (Femoral 27: Proximodist) | 1 | 0.143 | 0 --> 1 |
| 868 (Tibial 7: Rotation of t) | 1 | 0.222 | 1 --> 2 |
| 883 (Astragalar 1: Height of) | 1 | 0.087 | 1 --> 0 |
| 886 (Astragalar 4: Trochlear) | 1 | 0.077 | 1 --> 0 |
| 889 (Astragalar 6: Position ) | 1 | 0.667 | 1 --> 2 |
| 895 (Astragalar 12: Dorsal e) | 1 | 0.125 | 1 --> 0 |
| 916 (Calcaneal 14: Calcaneoc) | 1 | 0.231 | 1 --> 0 |
| 939 (Cuneiform 7: Prehallux)  | 1 | 0.500 | 1 --> 0 |
| 957 (Metatarsal 2 : From pro) | 1 | 0.250 | 0 --> 1 |
| 974 (Metatarsal 19: Stylar p) | 1 | 0.167 | 0 --> 1 |
| 975 (Metatarsal 20: Groove o) | 1 | 0.333 | 0 --> 1 |

---

**Table S7.**

Synapomorphic characters supporting the Scandentia clade

| Characters                    | Steps | CI    | Changes |
|-------------------------------|-------|-------|---------|
| 23 (I 23: Upper I2 size rela) | 1     | 0.136 | 2 ==> 1 |
| 30 (I 29: Upper I3 evolution) | 1     | 0.143 | 0 ==> 1 |
| 34 (I 33: Diastema between u) | 1     | 0.077 | 1 ==> 2 |
| 39 (C 4: Upper canine premol) | 1     | 0.091 | 0 --> 1 |
| 43 (C 8: Mesial crista on up) | 1     | 0.048 | 0 ==> 1 |
| 51 (P 1: Upper P1 presence)   | 1     | 0.059 | 0 ==> 1 |
| 56 (P 6: Upper P2 buccolingu) | 1     | 0.091 | 0 ==> 1 |
| 134 (P 81: Upper P4 stylar s) | 1     | 0.182 | 0 --> 1 |
| 167 (M 1: Upper M1 size rela) | 1     | 0.068 | 0 --> 2 |
| 193 (M 25: Upper M2 metaconu) | 1     | 0.239 | 1 --> 2 |
| 218 (M 50: Upper M1-2 metast) | 1     | 0.500 | 0 ==> 1 |
| 225 (M 57: Upper M1-2 stylar) | 2     | 0.120 | 0 --> 2 |
| 230 (M 62: Upper M1-2 distal) | 1     | 0.400 | 0 --> 1 |
| 237 (M 68: Upper M1-2 postpr) | 1     | 0.036 | 0 --> 1 |
| 247 (M 78: Upper M1-2 connec) | 1     | 0.143 | 1 --> 2 |
| 260 (i 4: Lower i2 size)      | 1     | 0.074 | 1 ==> 2 |
| 275 (i 19: Lower i2 crown sh) | 1     | 0.444 | 0 ==> 1 |
| 276 (i 20: Lower i2 crown or) | 1     | 0.105 | 1 ==> 0 |
| 286 (c 2: Lower canine size)  | 1     | 0.056 | 0 --> 1 |
| 288 (c 4: Lower canine lingu) | 1     | 0.160 | 0 --> 1 |
| 291 (c 7: Lower canine dista) | 1     | 0.111 | 0 --> 1 |
| 294 (c 10: Lower canine prem) | 1     | 0.091 | 0 --> 1 |
| 298 (p 1: Lower p1 evolutioa) | 1     | 0.053 | 0 ==> 1 |
| 328 (p 31: Lower p3 distal m) | 1     | 0.050 | 0 ==> 1 |
| 371 (p 74: Lower p4 entoconi) | 2     | 0.087 | 0 --> 2 |
| 380 (p 83: Lower p4 exodaeno) | 1     | 0.118 | 0 --> 1 |
| 385 (p 88: Lower premolar ov) | 1     | 0.192 | 1 --> 2 |
| 386 (m 1: Lower m1 overlap p) | 1     | 0.125 | 1 --> 2 |
| 421 (m 34: Lower m2 paraconi) | 1     | 0.185 | 0 --> 1 |
| 458 (m 71: Lower m1-2 post-e) | 1     | 0.105 | 0 --> 1 |
| 465 (m 78: Lower m1-2 posten) | 1     | 0.119 | 1 --> 0 |
| 466 (m 79: Lower m1-2 hypocr) | 1     | 0.108 | 2 ==> 3 |
| 468 (m 81: Lower m1-2 waiste) | 1     | 0.050 | 0 --> 1 |
| 471 (m 84: Lower m1-2 extens) | 1     | 0.042 | 1 --> 0 |
| 475 (m 88: Lower m2-3 trigon) | 1     | 0.077 | 1 ==> 0 |
| 482 (m 95: Lower m1-3 pre-en) | 1     | 0.095 | 1 --> 2 |
| 483 (m 96: Lower m1-3 taloni) | 1     | 0.105 | 1 --> 2 |
| 521 (Cranial 36: Pyramidal e) | 1     | 0.143 | 1 ==> 0 |
| 528 (Cranial 43: Ectotympani) | 1     | 0.333 | 1 ==> 0 |
| 533 (Cranial 48: Double prom) | 1     | 0.100 | 0 ==> 1 |
| 548 (Cranial 63: Medial pter) | 1     | 0.333 | 1 --> 2 |

|                               |   |       |         |
|-------------------------------|---|-------|---------|
| 549 (Cranial 64: Temporomand) | 1 | 0.200 | 1 ==> 0 |
| 573 (Cranial 88: Medial orbi) | 1 | 0.600 | 1 ==> 0 |
| 586 (Cranial 101: Position o) | 1 | 0.118 | 0 ==> 1 |
| 589 (Cranial 104: Metopic su) | 1 | 0.286 | 0 ==> 1 |
| 591 (Cranial 106: Interparie) | 1 | 0.143 | 1 ==> 2 |
| 599 (Cranial 114: Zygomatic ) | 1 | 1.000 | 0 ==> 1 |
| 615 (Cranial 130: Orientatio) | 1 | 0.182 | 0 --> 1 |
| 624 (Cranial 139: Postpalati) | 1 | 0.172 | 1 ==> 0 |
| 632 (Cranial 147: Maxillary ) | 1 | 0.091 | 0 ==> 1 |
| 646 (Cranial 161: Tentorium ) | 1 | 0.222 | 1 ==> 2 |
| 648 (Cranial 163: Projection) | 1 | 0.105 | 1 ==> 2 |
| 688 (Vertebral 1: C3-7 artic) | 1 | 0.667 | 0 ==> 2 |
| 693 (Vertebral 6: C3-5 ventr) | 1 | 0.100 | 0 --> 1 |
| 694 (Vertebral 7: Expansion ) | 1 | 0.250 | 1 --> 2 |
| 711 (Vertebral 24: Vertebra ) | 2 | 0.227 | 1 --> 3 |
| 724 (Scapular 11: Acomion pr) | 1 | 0.125 | 0 --> 1 |
| 760 (Humeral 26: Olecranon f) | 1 | 0.167 | 1 ==> 0 |
| 769 (Ulnar 2: Ventral projec) | 1 | 0.125 | 0 --> 1 |
| 777 (Ulnar 10: Crest for m. ) | 1 | 0.083 | 0 ==> 1 |
| 811 (Carpal 21: Orientation ) | 1 | 0.200 | 0 ==> 1 |
| 846 (Femoral 12: Crista para) | 1 | 0.087 | 0 ==> 1 |
| 869 (Tibial 8: Shape of medi) | 1 | 0.286 | 1 --> 2 |
| 870 (Tibial 9: Shape of dist) | 1 | 0.133 | 0 --> 1 |
| 891 (Astragalar 8: Medial ta) | 1 | 0.400 | 0 --> 1 |
| 899 (Astragalar 16: From dis) | 1 | 0.125 | 0 ==> 1 |
| 941 (Cuneiform 9: Plantar pr) | 1 | 0.167 | 1 ==> 2 |
| 956 (Metatarsal 1 : Proximal) | 1 | 0.600 | 0 ==> 1 |
| 1015 (Soft tissular 19: Feta) | 1 | 1.000 | 2 ==> 1 |
| 1024 (Soft tissular 28: Feta) | 1 | 0.667 | 0 ==> 2 |
| 1030 (Soft tissular 34: Feta) | 1 | 1.000 | 0 ==> 1 |
| 1031 (Soft tissular 35: Feta) | 1 | 0.667 | 1 --> 2 |
| 1039 (Diogo&Wood2011_Muscula) | 1 | 1.000 | 0 --> 1 |
| 1044 (Diogo&Wood2011_Muscula) | 1 | 0.500 | 0 --> 1 |
| 1062 (Diogo&Wood2011_Muscula) | 1 | 1.000 | 0 --> 1 |
| 1080 (Diogo&Wood2011_Muscula) | 1 | 1.000 | 0 --> 1 |
| 1090 (Diogo&Wood2011_Muscula) | 1 | 0.333 | 0 --> 1 |
| 1099 (Diogo&Wood2011_Muscula) | 1 | 1.000 | 0 --> 1 |
| 1106 (Diogo&Wood2011_Muscula) | 1 | 1.000 | 0 --> 1 |
| 1120 (Diogo&Wood2011_Muscula) | 1 | 1.000 | 0 --> 1 |
| 1122 (Diogo&Wood2011_Muscula) | 1 | 0.500 | 0 --> 1 |
| 1123 (Diogo&Wood2011_Muscula) | 1 | 1.000 | 0 --> 1 |
| 1154 (Diogo&Wood2011_Muscula) | 1 | 0.500 | 0 --> 1 |
| 1196 (Diogo&Wood2011_Muscula) | 1 | 0.500 | 0 --> 1 |
| 1201 (Molecular 2: SINEs and) | 1 | 1.000 | 0 ==> 1 |
| 1202 (Molecular 3: SINEs and) | 1 | 1.000 | 0 ==> 1 |

**Supplementary Datasets as TNT and NEXUS files (separate files)**

Ni\_2015\_Treeshrews\_TNT.doc

Ni\_2015\_Treeshrews\_NEXUS.doc
